# Supplementary material for: Associations of Perfluoroalkyl substances (PFAS) with terminal ductal lobular unit involution of the normal breast
Source: Research Square preprint supplement (doi:10.21203/rs.3.rs-6829962/v1), 2025-07-02
Supplement: Supplementary file 1 [file 6da0d64cbd77b328caa41928.docx]

**Supplemental Figure 1.** Plots generated by BKMR analyses exploring independent effects of PFASs mixture components on any observed TDLUs (yes *vs* no) (N=263).

**Supplemental Figure 2.** Plots generated by BKMR analysis to evaluate each PFASs mixture component per one SD increase when setting the other mixture components at 25th, 50th, or 75th percentiles on any observed TDLUs (yes *vs* no) (N=263).

**Supplemental Figure 3.** Plot from BKMR analysis evaluating the overall effect of the PFAS mixture on the outcome of any observed TDLUs (yes *vs* no) (N=263).

**Supplemental Figure 4.** Plots from BKMR analysis exploring bivariate interactions between each component of the PFASs mixture on the outcome of any observed TDLUs (yes *vs* no) (N=263).

**Supplemental Figure 5.** Plots generated by BKMR analyses exploring independent effects of PFASs mixture components on number of observed TDLUs (N=263).

**Supplemental Figure 6.** Plots generated by BKMR analysis to evaluate each PFASs mixture component per one SD increase when setting the other mixture components at 25th, 50th, or 75th percentiles on number of observed TDLUs (N=263).

**Supplemental Figure 7.** Plot from BKMR analysis evaluating the overall effect of the PFAS mixture on the outcome of number of observed TDLUs (N=263).

**Supplemental Figure 8.** Plots from BKMR analysis exploring bivariate interactions between each component of the PFASs mixture on the outcome of number of observed TDLUs (N=263).
